# Supplementary material
Source: PubMed Central journal article supplement (PMC3896086)
Supplement: NIHMS542576-supplement-01.pdf [file NIHMS542576-supplement-01.pdf]

## **Supplemental Materials**

### **Pluripotency Factors and Polycomb Group Proteins Repress Aryl Hydrocarbon Receptor Expression in Murine Embryonic Stem Cells**

Chia-I Ko, Qin Wang, Yunxia Fan, Ying Xia and Alvaro Puga<sup>¶</sup>

**Supplemental Table S1 –List of antibodies used in our analyses.**

| <b>Target antigen</b> | <b>Company</b>                            | <b>Catalog number</b> |
|-----------------------|-------------------------------------------|-----------------------|
| AHR                   | Enzo, Farmingdale, NY, USA                | SA-210                |
| $\beta$ Actin         | Sigma-Aldrich, St. Louis, MO, USA         | A1978                 |
| EZH2                  | Active Motif, Carlsbad, CA, USA           | 39901                 |
| GATA4                 | Santa Cruz Biotechnology, Dallas, TX, USA | sc-9053               |
| H3ac                  | Upstate, Billerica, MA, USA               | 06-599                |
| H3K27ac               | Abcam, Cambridge, MA, USA                 | ab-4729               |
| H3K27me1              | Upstate                                   | 07-448                |
| H3K27me2              | Abcam                                     | ab-24684              |
| H3K27me3              | Upstate                                   | 07-449                |
| H3K36me3              | Abcam                                     | ab-9050               |
| H3K4ac                | Upstate                                   | 04-539                |
| H3K4me1               | Abcam                                     | ab-8895               |
| H3K4me2               | Upstate                                   | 07-030                |
| H3K4me3               | Upstate                                   | 04-745                |
| H3K9ac                | Upstate                                   | 07-352                |
| H3K9me1               | Upstate                                   | 07-450                |
| H3K9me2               | Upstate                                   | 17-648                |
| H3K9me3               | Upstate                                   | 07-442                |
| KDM6A                 | Abcam                                     | ab36938               |
| KDM6B                 | Abcam                                     | ab38113               |
| KRT14                 | NeoMarkers, New York, NY, USA             | RB-9020-P0            |
| MLL                   | Millipore, Billerica, MA, USA             | 05-765                |
| NANOG                 | Millipore                                 | ab-5731               |
| normal rabbit IgG     | Santa Cruz Biotechnology                  | sc-2027               |
| normal mouse IgG      | Santa Cruz Biotechnology                  | sc-2025               |
| OCT3/4                | Santa Cruz Biotechnology                  | sc-9081               |
| RING1B                | Abcam                                     | Ab3832                |
| RNAPII-S2pS5p         | Covance, Greenfield, IN, USA              | MMS-129R              |
| RNAPII-S5p            | Upstate                                   | 05-623                |
| RNAPII-S7p            | Active Motif                              | 61087                 |
| SOX2                  | Cell Signaling, Danvers, MA, USA          | 2748                  |
| Sp1                   | Santa Cruz Biotechnology                  | sc-59X                |
| Sp3                   | Santa Cruz Biotechnology                  | sc-644X               |
| SUZ12                 | Millipore                                 | CS203201              |
| TNNT2                 | NeoMarkers                                | MS-295-P1             |

**Supplemental Table S2 – PCR primer sequences, designation and location.**

| Primer                                   |                                  | Forward Sequence         | Reverse Sequence         | PCR Amplicon Size (bp) |
|------------------------------------------|----------------------------------|--------------------------|--------------------------|------------------------|
| <b><u>ChIP assays</u></b>                |                                  |                          |                          |                        |
| <u>Designation in Figures</u>            | <u>Coordinates (bp from TSS)</u> |                          |                          |                        |
| -3.0 kb                                  | -3,070 / -2,930                  | GGAGACGTGGAGATGTTTGG     | CCTGCTGAGAGTTGCCTTTT     | 141                    |
| -2.0 kb                                  | -1,985 / -1,896                  | ACCCACAGGGCATCACCACAC    | TGGGGCAACCTGTGAGGTAGAAA  | 90                     |
| -0.5 kb                                  | -522 / -373                      | TCTGATGGAGGAAACGATGT     | AACTGCGACTGGAGAGCATT     | 150                    |
| -0.16 kb                                 | -201 / -137                      | ACCACCCACCCCAAGAAC       | CCCACCTCTTCGCAGCACG      | 65                     |
| +0.14 kb                                 | +78 / +191                       | ACTGGTGGACGGACTCGGGG     | CGGTCCCAGGGGTCAGGAGG     | 114                    |
| +30.4 kb                                 | +30,309 / +30,430                | CCGTGAGCAAGTGCGGGAGT     | TGAGGGGCCCGCCAGAGAGTG    | 122                    |
| +34.5 kb                                 | +34,322 / +34,392                | TCGTCCGACTTGAGCAGCATTGG  | CGGGCTTCCGCCAGGTGATG     | 71                     |
| <b><u>mRNA qRT PCR Analyses</u></b>      |                                  |                          |                          |                        |
| Gapdh                                    |                                  | AACTTTGGCATTGTGGAAGG     | GGATGCAGGGATGATGTTCT     | 132                    |
| Mature Ahr mRNA (Set F)                  |                                  | GGCCAAGAGCTTCTTTGAATG    | TGCCAGTCTCTGATTTGTGC     | 93                     |
| Cyp1a1                                   |                                  | GTGTCTGGTTACTTTGACAAGTGG | AACATGGACATGCAAGGACA     | 199                    |
| Oct3/4                                   |                                  | GGCGTTCTCTTTGGAAAGGTGTTT | CTCGAACCACATCCTTCTCT     | 313                    |
| Nanog                                    |                                  | AGGGTCTGCTACTGAGATGCTCTG | CAACCACTGGTTTTTCTGCCACCG | 364                    |
| Nestin                                   |                                  | GCCAGCACTCCCATCCCACC     | AGCCTGTTGCCTCCCACCCTG    | 108                    |
| Notch1                                   |                                  | TCTGCTTATGCCTCAAGGGAACCA | AATCTTGTCCAGACAGGTGCCAGA | 101                    |
| T                                        |                                  | TGCTGCAGTCCCATGATAACTGGT | ACCATTGCTCACAGACCAGAGACT | 131                    |
| Hand2                                    |                                  | CCAAGGACGACCAGAACG       | GCTCTCCTCTTCTTCACTGCTT   | 201                    |
| Tnnt2                                    |                                  | CGGAAGAGTGGGAAGAGACA     | TTTCGTATTTCTGCTGCTTGAA   | 143                    |
| Foxa2                                    |                                  | AAGTATGCTGGGAGCCGTGAAGAT | CGCGGACATGCTCATGTATGTGT  | 148                    |
| Gata4                                    |                                  | TCTCACTATGGGCACAGCAG     | GCGATGTCTGAGTGACAGGA     | 136                    |
| <b><u>Short Ahr mRNA transcripts</u></b> |                                  |                          |                          |                        |
| Set A                                    |                                  | GTGTGTGCGCTCCCTTTG       | ACACGCGTGGGGCACCGA       | 39                     |

|       |                      |                      |     |
|-------|----------------------|----------------------|-----|
| Set B | GTGTGTGCGCTCCCTTTG   | CCTCTCCGGGACACGCGT   | 50  |
| Set C | GTGTGTGCGCTCCCTTTG   | CCCCGAGTCCGTCCACCAGT | 97  |
| Set D | TGCGCTCCCTTTGACGCTCG | GGAGGGGCCGCAGTGCTCTA | 91  |
| Set E | CAGCGGCGCCAACATCACCT | AGGCTGGCCAGGCGGTCTAA | 150 |

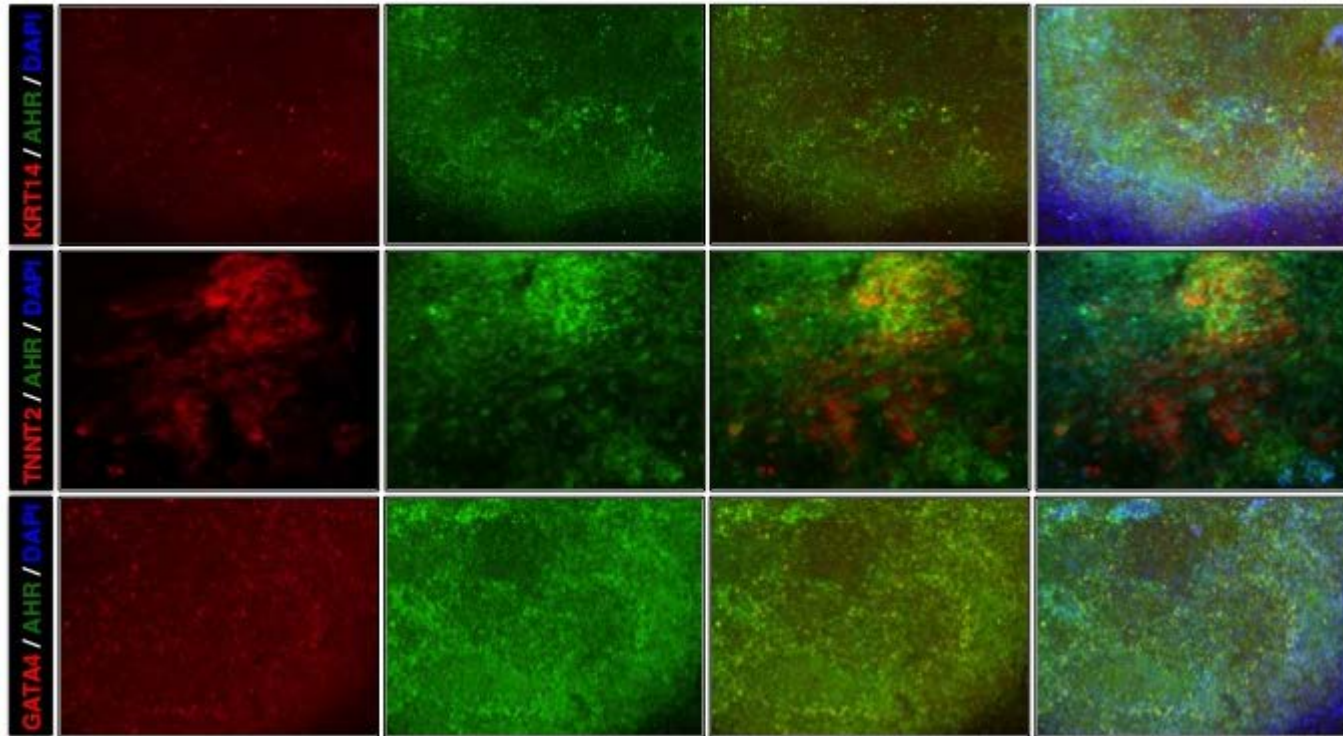

**Supplemental Fig. S1. Expression of germ cell markers.** Keratin 14 (ectoderm), troponin-T (mesoderm), Gata4 (endoderm), and their co-localization with AHR were visualized by immunostaining with specific primary antibodies. Nuclei were stained with Hoechst and micrographs were taken at 20X magnification.
